# Supplementary material for: Ideas and perspectives: Heat stress: more than hot air
Source: Copernicus journal article supplement (doi:10.5194/bg-2016-102), 2016-03-21
Supplement: Supplementary file 1 [file bg-2016-102-supplement.pdf]

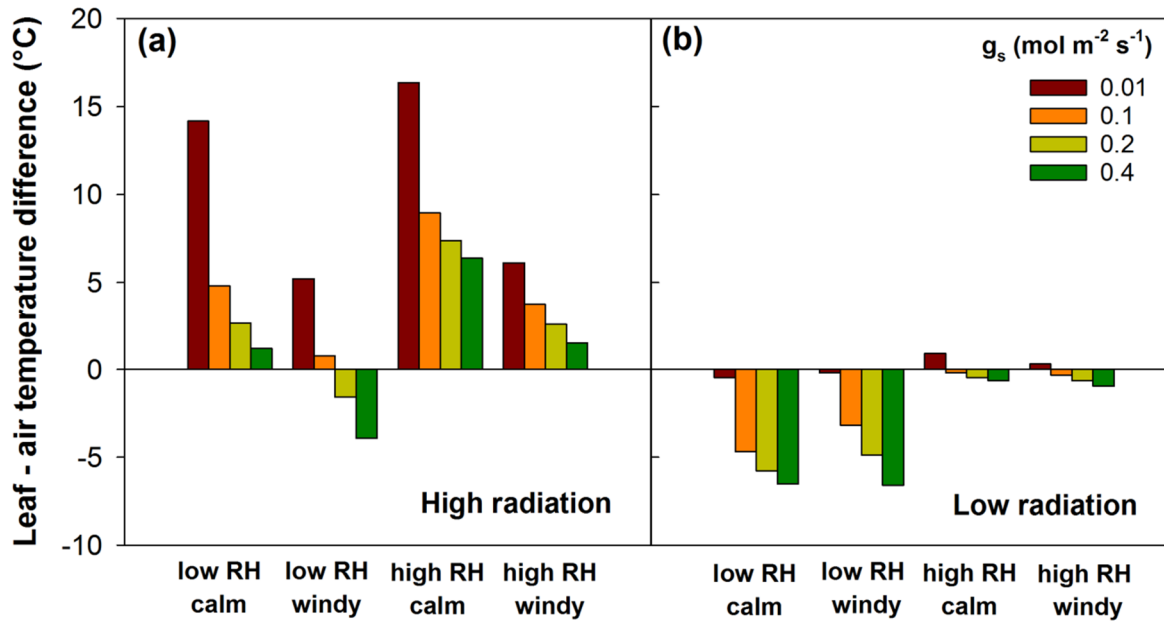

Figure S1: Modelled leaf-to-air temperature difference depending on type of heat wave and stomatal conductance ( $g_s$ ). Type of heat wave: high (A) or low (B) incident shortwave radiation ( $800$  or  $100 \text{ W m}^{-2}$ ), high or low relative humidity of the air ( $\text{RH} = 0.90$  or  $0.45$ ), and calm or windy weather (wind speed  $0.1$  or  $6 \text{ m s}^{-1}$ ). Air temperature was set to  $40 \text{ }^\circ\text{C}$  in all simulations, and leaf width to  $0.2 \text{ m}$ .
